# Supplementary material for: Structure and cleavage of monosodium urate monohydrate crystals
Source: Royal Society of Chemistry journal article supplement (doi:10.1039/c8cc10050k), 2019-01-01
Supplement: c8cc10050k1.pdf [file c8cc10050k1.pdf]

## Supplementary Information

### Structure and cleavage of monosodium urate monohydrate crystals

Rachael G. E. Molloy, Weihao Sun, Jialu Chen and Wuzong Zhou

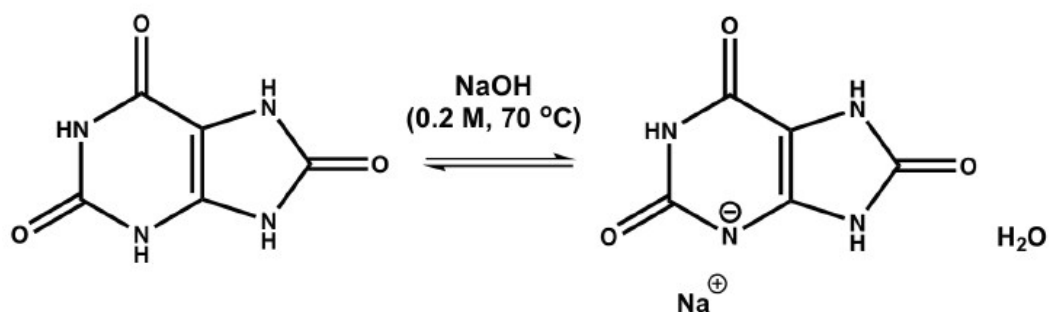

**Fig. S1** The reaction of uric acid with NaOH to produce monosodium urate monohydrate (MSU).

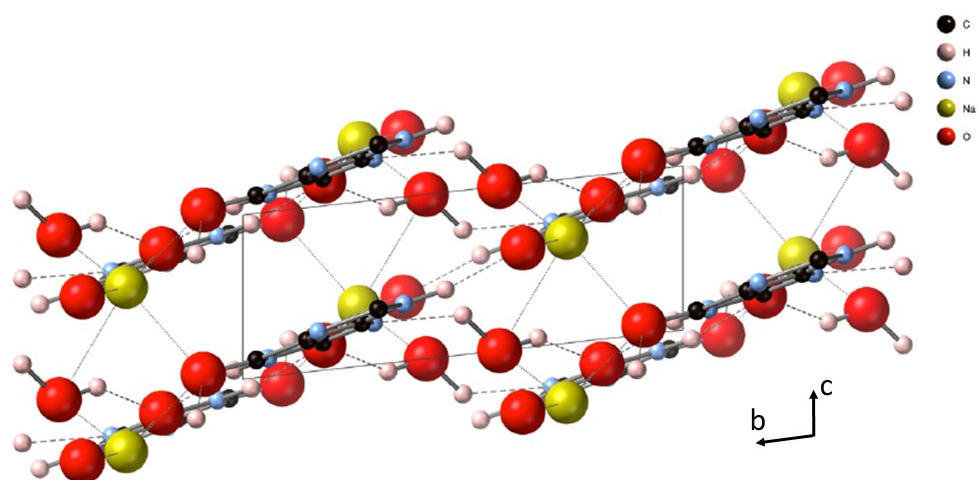

**Fig. S2** Structural model of MSU crystal looking down the [100] zone axis. The unit cell is outlined by the parallelogram.

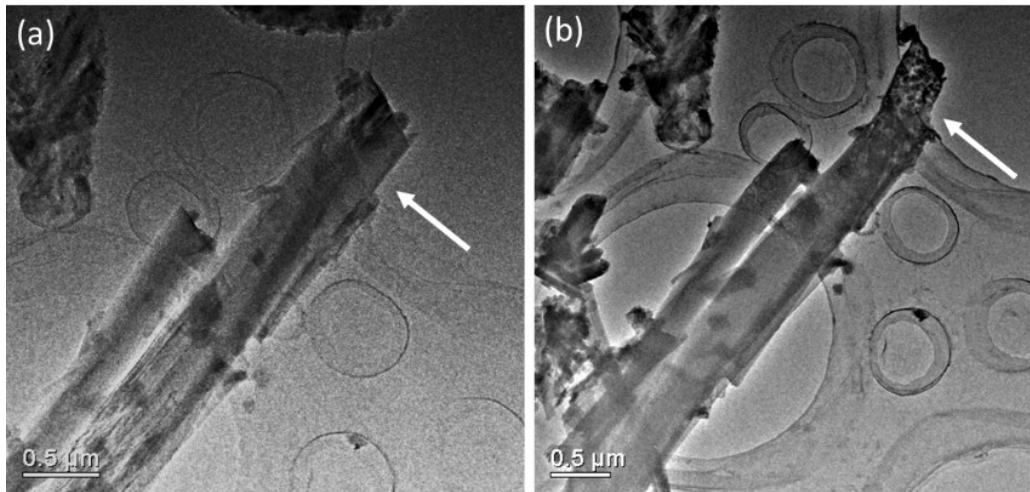

**Fig. S3** TEM images of a MSU crystal (a) before and (b) after electron beam irradiation under HRTEM conditions for a few seconds. The arrows point to the exposed area under HRTEM conditions.

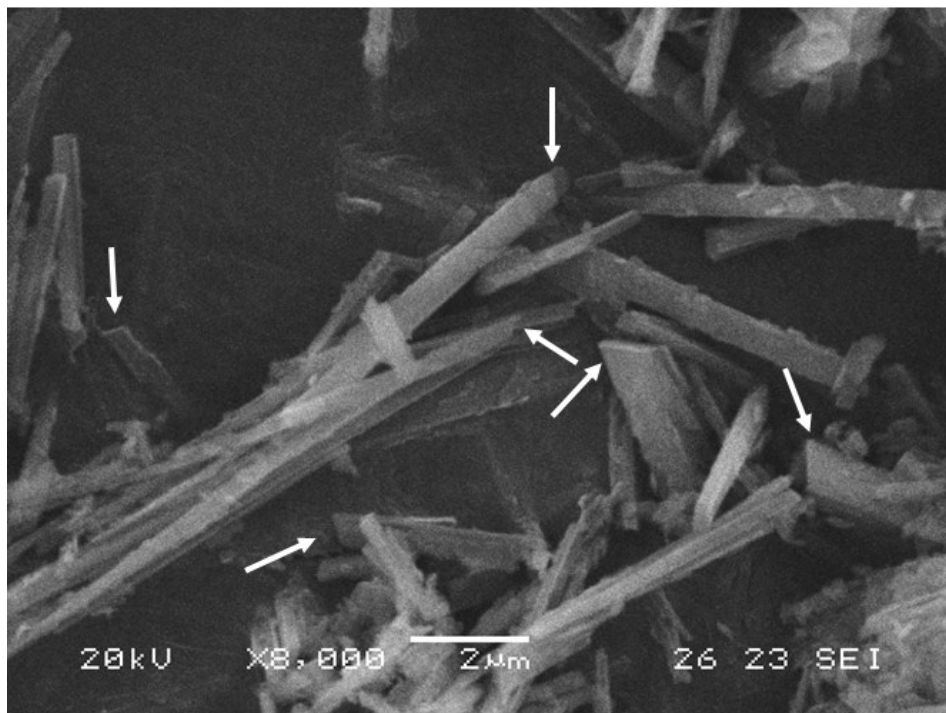

**Fig. S4** SEM image of as-synthesised MSU crystals. The arrows point to the inclined planes at the ends of needle-shaped particles.

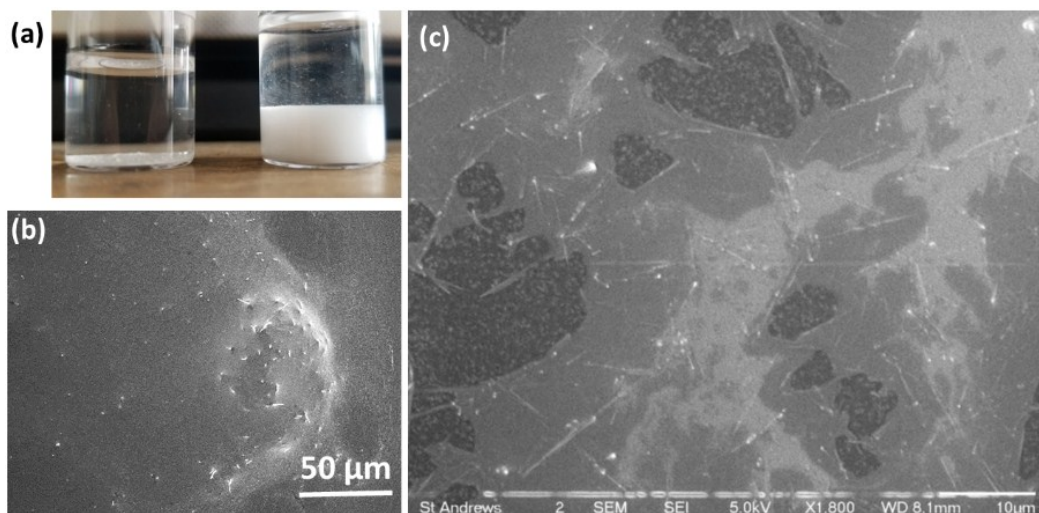

**Fig. S5** (a) A comparison of appearance of MSU precipitates in a solution, (left) before and (right) after a sonochemical treatment. (b) SEM image of a thick gel of polymerised MSU molecules with some remaining MSU crystals (bright spots) after sonication for 15 min. (c) SEM image of a thin gel region of the sample after sonication for 45 min. The bright lines are the remaining MSU crystals.

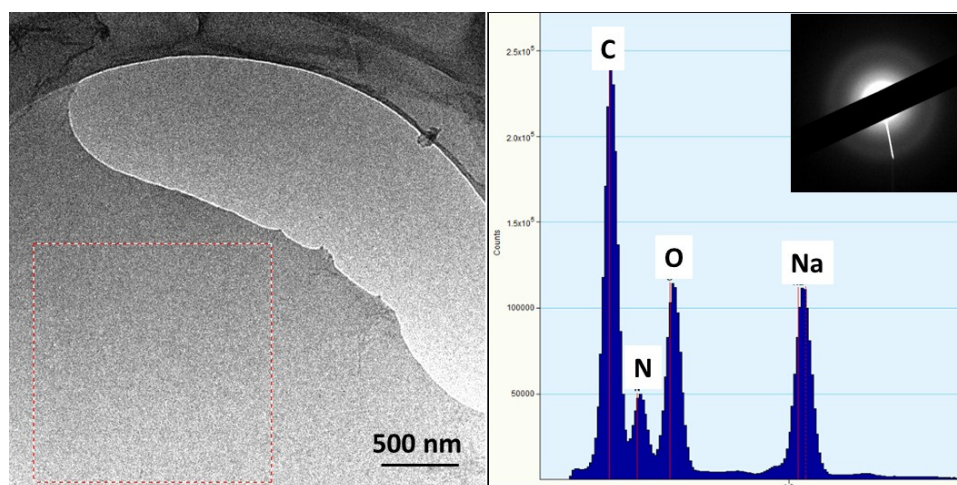

**Fig. S6** TEM image of a thin layer amorphous component in sonicated MSU specimen, and corresponding SAED pattern and EDX spectrum from the selected area marked by the square.

**Table S1** Compositions of buffer solutions with different pH values.

| pH   | Solution x                      | Volume x (ml) | Solution y | Volume y (ml) |
|------|---------------------------------|---------------|------------|---------------|
| 1.0  | 0.2 M KCl                       | 50.0          | 0.2 M HCl  | 97.0          |
| 2.0  | 0.2 M KCl                       | 50.0          | 0.2 M HCl  | 10.6          |
| 3.0  | 0.2 M potassium acid phthalate  | 50.0          | 0.2 M HCl  | 20.3          |
| 4.0  | 0.2 M succinic acid             | 50.0          | 0.2 M NaOH | 20.0          |
| 5.0  | 0.2 M succinic acid             | 50.0          | 0.2 M NaOH | 53.4          |
| 6.0  | 0.2 M succinic acid             | 50.0          | 0.2 M NaOH | 87.0          |
| 7.0  | 0.2 M tris acid maleate *       | 50.0          | 0.2 M NaOH | 48.0          |
| 7.4  | 0.2 M tris acid maleate         | 50.0          | 0.2 M NaOH | 54.0          |
| 8.0  | 0.2 M tris acid maleate         | 50.0          | 0.2 M NaOH | 69.0          |
| 9.0  | tris(hydroxymethyl)aminomethane | 50.0          | 0.2 M HCl  | 5.0           |
| 10.0 | 0.2 M Ammediol                  | 50.0          | 0.2 M HCl  | 2.0           |

\*0.2 M solution of tris acid maleate (24.2 g of tris(hydroxymethyl)aminomethane + 23.2 g of maleic acid in 1000 ml).
